# Supplementary material for: X-ray Structure and Enzymatic Activity Profile of a Core Papain-like Protease of MERS Coronavirus with utility for structure-based drug design
Source: PubMed Central journal article supplement (PMC5228125; doi:10.1038/srep40292), 2017-01-12

## **Supplementary Information**

### **X-ray Structure and Enzymatic Activity Profile of a Core Papain-like Protease of MERS Coronavirus with utility for structure-based drug design**

Jozlyn Clasman<sup>1</sup>, Yahira M. Báez-Santos<sup>1,2</sup>, Robert C. Mettelman<sup>3</sup>, Amornrat O'Brien<sup>3</sup>, Susan C. Baker<sup>3</sup>, and Andrew D. Mesecar<sup>1,4,5,6</sup>

<sup>1</sup>Department of Biological Sciences, Purdue University, West Lafayette, IN

<sup>2</sup>Current Address: Weldon School of Biomedical Engineering, Purdue University, West Lafayette, IN

<sup>3</sup>Department of Microbiology and Immunology, Loyola University Chicago, Stritch School of Medicine, Maywood, IL

<sup>4</sup>Department of Biochemistry, Purdue University, West Lafayette, IN

<sup>5</sup>Center for Cancer Research, Purdue University, West Lafayette, IN

## Figures

**Supplementary Figure S1.** The kinetic response of MERS-CoV PLpro-Ubl2 (black circles) and PLpro- $\Delta$ Ubl2 (white circles) to the increasing concentrations of three different ubiquitin-based substrates. (a) RLRGG-AMC. (b) ISG15-AMC. (c) Ub-AMC. Data in panel a failed to reach saturation and were therefore fit to a line whereas panels b and c were fit to the Michaelis-Menten equation. All data were measured in triplicate, and the error bars represent the standard deviations from the triplicate data.

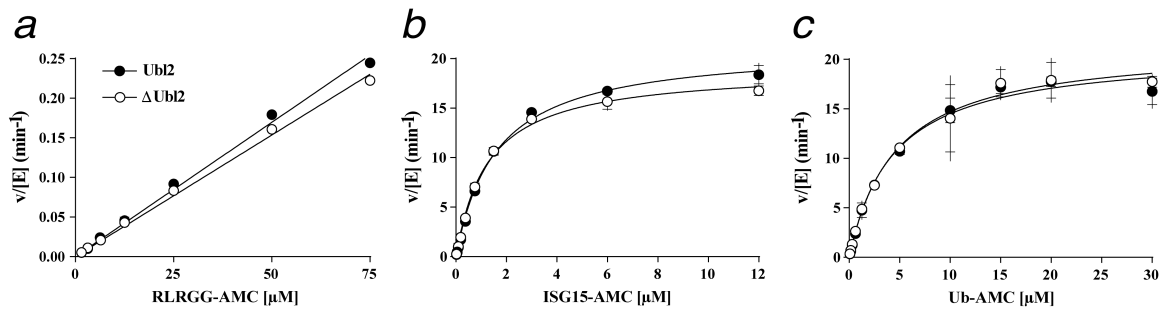

**Supplementary Figure S2.** *In vitro* analysis of F2124-0890 with proteases under non-reducing conditions reveals its lack of specificity and lack of potency under reducing conditions. Percent (%) inhibition was plotted as a function of increasing inhibitor concentrations in the absence of DTT (white circles) and presence of DTT (black circles) against viral and human proteases, MERS PLpro-Ubl2 (solid line, a) and PLpro- $\Delta$ Ubl2 (dotted line, a), SARS PLpro (b), MHV PLP2 (c), USP7 (d), USP17 (e), and USP28 (f). Error bars represent the standard deviations obtained from triplicate data.

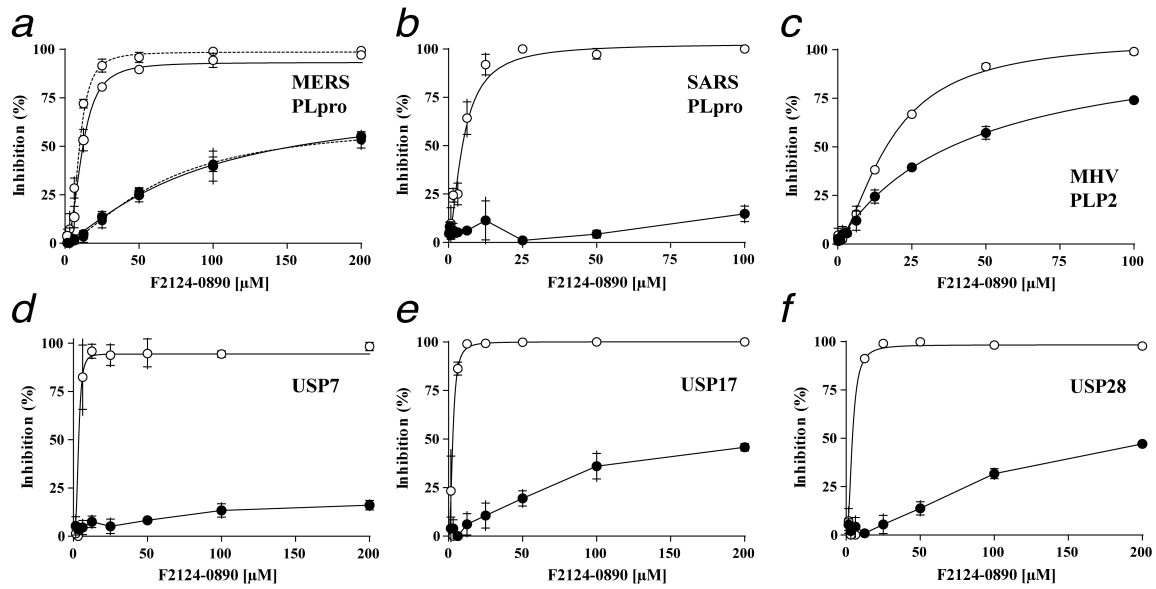

Supplement: srep40292-s1.pdf [file srep40292-s1.pdf]
